# Supplementary material
Source: PubMed Central journal article supplement (PMC2613060)
Supplement: en.2008-0274_2.pdf [file en.2008-0274_2.pdf]

Supplemental Tables

Supplemental Table 1. Primers for PCR analysis

| Transcript                | Forward Primer             | Reverse Primer              |
|---------------------------|----------------------------|-----------------------------|
| rat neuroligin-1          | 5'—gatggaccagcgagaacatt—3' | 5'—atcgtacacaggtccaagg—3'   |
| rat neuroligin-2          | 5'—tttctgctgggaattgtacc—3' | 5'—cctgctatgcaaggaggaag—3'  |
| rat neuroligin-3          | 5'—gacggggatgaagatgaaga—3' | 5'—agccctcagagtgatgaga—3'   |
| rat neurexin-1 $\alpha$   | 5'—gcagatacccttcgactgga—3' | 5'—tcatacattgtccactga—3'    |
| rat neurexin-1 $\beta$    | 5'—gcacctcgagaagactgtcc—3' | 5'—cggagcatcctctgtgtacat—3' |
| rat neurexin-2 $\alpha$   | 5'—tcaacctgtccctcaagtcc—3' | 5'—ggtgtaatcctcctgctgt—3'   |
| rat neurexin-2 $\beta$    | 5'—gtctcgtccagcctcagc—3'   | 5'—gggagccatgtataggtga—3'   |
| rat neurexin-3 $\alpha$   | 5'—cattgtggagccagtgaatg—3' | 5'—gcccaacataggaggagtc—3'   |
| rat neurexin-3 $\beta$    | 5'—tgggagaagtccatcagtc—3'  | 5'—gcttctggtgacctactctg—3'  |
| human neuroligin-1        | 5'—gttggccacaaaagtgtgt—3'  | 5'—ttgagtgaagatccgctgtg—3'  |
| human neuroligin-2        | 5'—ggcttaaggacacagtgga—3'  | 5'—gattgtcgggattgtttgg—3'   |
| human neuroligin-3        | 5'—caccctgtggtcctcagtt—3'  | 5'—cgtggatgtagacctgacg—3'   |
| human neurexin-1 $\alpha$ | 5'—cgacttctggagctgattc—3'  | 5'—agcacacacctccgttgag—3'   |
| human neurexin-1 $\beta$  | 5'—cggctatgttccgattgt—3'   | 5'—tcaatggcgtatcactctg—3'   |
| human neurexin-2 $\alpha$ | 5'—ttgtcatcgagctggtcaag—3' | 5'—tggcacaggactctcagtg—3'   |
| human neurexin-2 $\beta$  | 5'—ccggcaggaaacttgataa—3'  | 5'—catctgttctgggtggtg—3'    |
| human neurexin-3 $\alpha$ | 5'—ctctggcaccatcaagtga—3'  | 5'—ttctgcagggttagctgtc—3'   |
| human neurexin-3 $\beta$  | 5'—aaactcacctgaaccacttg—3' | 5'—cccatcatagcaggaggaag—3'  |
| mouse neuroligin-1        | 5'—ggggatgaggttcctatgt—3'  | 5'—ccgtggatggcactttagt—3'   |
| mouse neuroligin-2        | 5'—tagcaggtgggagcagactt—3' | 5'—agacacaagtgggagggttg—3'  |
| mouse neuroligin-3        | 5'—acatggaaggaacaggcaac—3' | 5'—agagccacttggatgatgg—3'   |
| mouse neurexin-1          | 5'—agttgtacctgggtggttg—3'  | 5'—aaaccgttgcctctctca—3'    |
| mouse neurexin-2          | 5'—caccaccagaacacagatg—3'  | 5'—tgttctcttggccttgcctt—3'  |
| mouse neurexin-3          | 5'—tcctaaccacaacgggctac—3' | 5'—ctcagtgtgctgaaagtcaa—3'  |

Supplemental Table 2. Primers and Taqman Probes for Real Time PCR Analysis in INS-1 Cells and Rat Islets.

| Transcript          | Forward Primer                 | Reverse Primer                | Probe                              |
|---------------------|--------------------------------|-------------------------------|------------------------------------|
| Neuroligin-1        | 5'—tccatagctgctccacca—3'       | 5'—cggatatcagaccaggagatg—3'   | 5'—agaacatcgatttcagctccagaacca—3'  |
| Neuroligin-2        | 5'—ggcagatgtagcctgatgac—3'     | 5'—cgccaatgagcatgttcgtagt—3'  | 5'—tgagatcctcatcaacagggagaattcc—3' |
| Neuroligin-3        | 5'—ggaagtagcctgtccaaatata—3'   | 5'—gatcacgacaccttggttca—3'    | 5'—cccggaccagctctactctcacatc—3'    |
| Neurexin-1 $\alpha$ | 5'—ttccgcaacaccactctctaca—3'   | 5'—ccctgcgcttgactga—3'        | 5'—cgctgaggccaagtgggtgga—3'        |
| Neurexin-1 $\beta$  | 5'—gcgcaccacatccacat—3'        | 5'—gctggtgacctgtagattgcaat—3' | 5'—catggcagcagcaagcatcattcagt—3'   |
| Neurexin-2          | 5'—cacggatgacattacaattgatga—3' | 5'—agcgcaccacgtgatattg—3'     | 5'—ccaacgccatctgtagcgacg—3'        |
| Neurexin-3          | 5'—gaccagcacacgctctga—3'       | 5'—tgcgtactaagacaccatcctca—3' | 5'—tcgccgtgggattcagcaca—3'         |
| 18s                 | 5'—cgccgctagaggtgaaattc—3'     | 5'—ttggcaaatgctttcgtc—3'      | 5'—tgaccggcgcaagacggac—3'          |

Supplemental Table 3. Primers for Real Time PCR analysis of Human Islets.

| Transcript          | Forward Primer                   | Reverse Primer                  |
|---------------------|----------------------------------|---------------------------------|
| Neurologin-1        | 5'—aatggatgatgtggaccactggt—3'    | 5'—agatggtggttctggaggctgaaa—3'  |
| Neurologin-2        | 5'—ccgagcgtatcaccatctt—3'        | 5'—gcagacactccacagcttca—3'      |
| Neurologin-3        | 5'—tcacctgcctacagcaacgagaat—3'   | 5'—aggccagaacgttaaggacagga—3'   |
| Neurexin-1 $\alpha$ | 5'—caacaatgtggaaggtctgg—3'       | 5'—atattgtcaccatagcgtgtc—3'     |
| Neurexin-1 $\beta$  | 5'—cacatccaccatttccatgg—3'       | 5'—ttccctggtgtatatgcag—3'       |
| Neurexin-2 $\alpha$ | 5'—gtcaatggcaagtcaacga—3'        | 5'—cttatagaccacgtccttgag—3'     |
| Neurexin-2 $\beta$  | 5'—ccaccactccacagcaag—3'         | 5'—gcgaagttgtgttaagtgtg—3'      |
| Neurexin-3 $\alpha$ | 5'—gcgaagttgtgttaagtgtg—3'       | 5'—ctgatatagtacgtatctgcca—3'    |
| Neurexin-3 $\beta$  | 5'—tgtagcttctcctcctcca—3'        | 5'—accaagatgccatccttcac—3'      |
| Beta-Actin          | 5'—tcatgaagtgtgacgttgacatccgt—3' | 5'—cctagaagcatttgcggtcacgatg—3' |
| 18s                 | 5'—cgccgctagaggtgaaattc—3'       | 5'—ttggcaaatgctttcgctc—3'       |

Supplemental Table 4. Primers for Splice Site Analysis of Neurexin and Neurologin in INS-1 Cells and Human Islets.

| Transcript                  | Forward Primer                 | Reverse Primer                |
|-----------------------------|--------------------------------|-------------------------------|
| rat nlg-1 flanking SSA      | 5'—tgtgcaagaccagagtgaaga—3'    | 5'—taccgtagcttccaacaca—3'     |
| human nlg-1 flanking SSA    | 5'—ctcctgtgtgtcccagaat—3'      | 5'—cccactgtcccgaatatct—3'     |
| rat nlg-1 internal SSA      | 5'—caccatctccctgtgtgat—3'      | 5'—atcttctgccgggtttct—3'      |
| human nlg-1 internal SSA    | 5'—ctcctgtgtgtcccagaat—3'      | 5'—atatttctgccgggcttt—3'      |
| rat nlg-1 flanking SSB      | 5'—gctgactttatcccattatctgaa—3' | 5'—gctggaagggtgttccactctga—3' |
| human nlg-1 flanking SSB    | 5'—ctgcaaaggggaactatgga—3'     | 5'—actaacagcccagctggaaa—3'    |
| rat nlg-1 internal SSB      | 5'—tggggtacttggcttcttg—3'      | 5'—ttgctccaacggttacctc—3'     |
| human nlg-1 internal SSB    | 5'—ggtaaccgttgagcaattc—3'      | 5'—tgtggtatcgagctggtga—3'     |
| rat nlg-2 flanking SSA      | 5'—tgtgtgtgtcaccgacaact—3'     | 5'—gccgtgtagaacagcatga—3'     |
| human nlg-2 flanking SSA    | 5'—tgtgtgtgtcaccgacaact—3'     | 5'—tgagaaacagcatcacagg—3'     |
| rat nlg-2 internal SSA      | 5'—tgtgtgtgtcaccgacaact—3'     | 5'—tatctgtgtctggcgattg—3'     |
| human nlg-2 internal SSA    | 5'—ccatcatgctgctgtgtg—3'       | 5'—gattgagctcgctcgt—3'        |
| rat nlg-1 flanking SSA1/2   | 5'—ttatccaggagcccacag—3'       | 5'—tcctggtatgtagaccatga—3'    |
| human nlg-1 flanking SSA1/2 | 5'—ggtcactgccaactggat—3'       | 5'—cgtggtatgtagaccatgacg—3'   |
| rat nlg-1 internal SSA1     | 5'—cccagaacatccacacagc—3'      | 5'—atcttctgttgggtttcg—3'      |
| human nlg-1 internal SSA1   | 5'—tgtaaagcggattccaagg—3'      | 5'—cgtggtatgtagaccatgacg—3'   |
| rat nlg-1 internal SSA2     | 5'—aagaacagggcgaggactt—3'      | 5'—atgacgatgacgttgcata—3'     |
| human nlg-1 internal SSA2   | 5'—aagaacagggcgaggactt—3'      | 5'—ggtgatgacgatgacattgc—3'    |
| rat nrxn-1 flanking SS4     | 5'—gcctgggtgactaccttgag—3'     | 5'—tgtggtggtctccatgattg—3'    |
| human nrxn-1 flanking SS4   | 5'—acagatgacatgccattga—3'      | 5'—ccgcaattattatggttgc—3'     |
| rat nrxn-1 internal SS4     | 5'—acagatgacatgccattga—3'      | 5'—aggcgtcttatcattgtt—3'      |
| human nrxn-1 internal SS4   | 5'—acatgccattgaagaatcc—3'      | 5'—ccattcatcaactactcgacca—3'  |

Supplemental Table 5. Neurologin-2 SiRNA Pool

| SiRNA # | Sense                      | Antisense (5'P on all)     |
|---------|----------------------------|----------------------------|
| 1       | 5'—gagcuaagcgugacuguagu—3' | 5'—cuacagucacgcuuagcucu—3' |
| 2       | 5'—gcacggaagcugugaaugu—3'  | 5'—cauuccacagcuuccgugcu—3' |
| 3       | 5'—gcgagcagucagaccuauu—3'  | 5'—uaggucagucacugcgcuu—3'  |
| 4       | 5'—guauggagcaagucaacu—3'   | 5'—uguugaacuugcucacu—3'    |
