# Supplementary material
Source: PubMed Central journal article supplement (PMC2613060)

Supplemental Figures

Supplemental Figure 1.

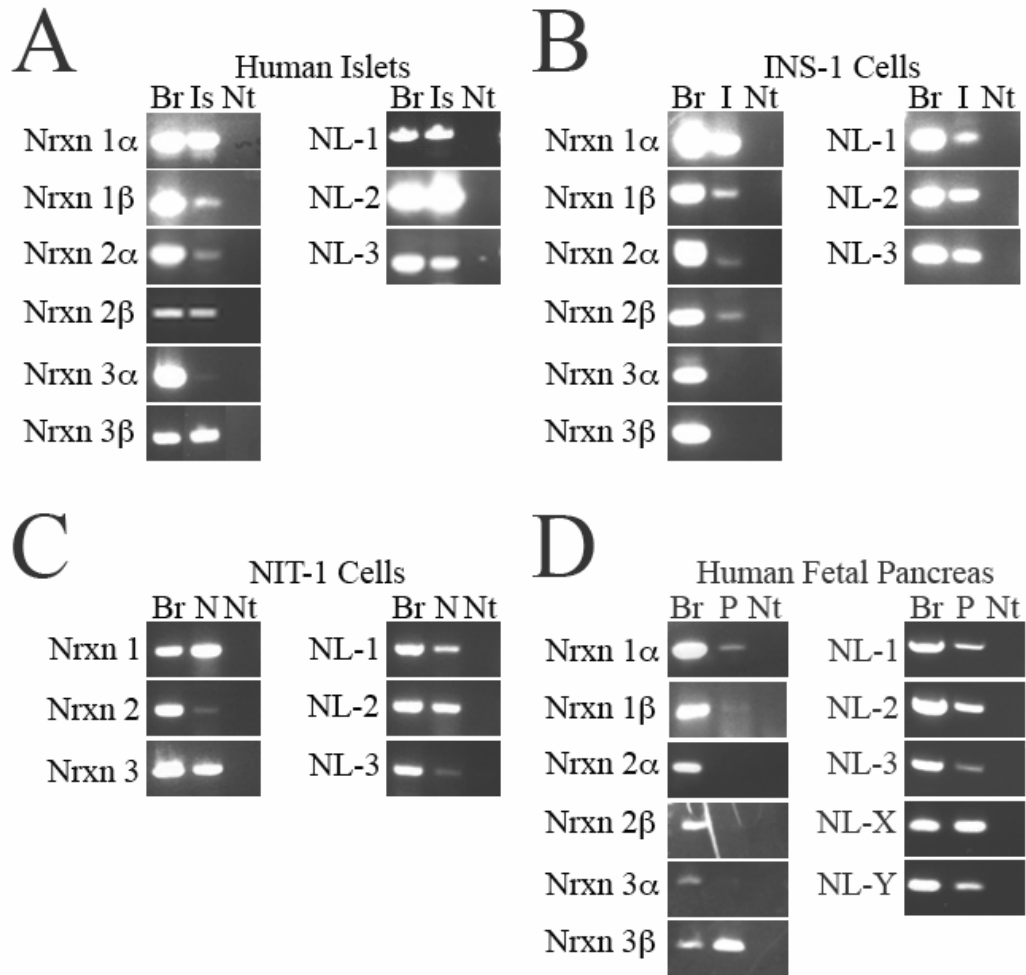

Supplement: en.2008-0274_3.pdf [file en.2008-0274_3.pdf]

Supplemental Figure 2.

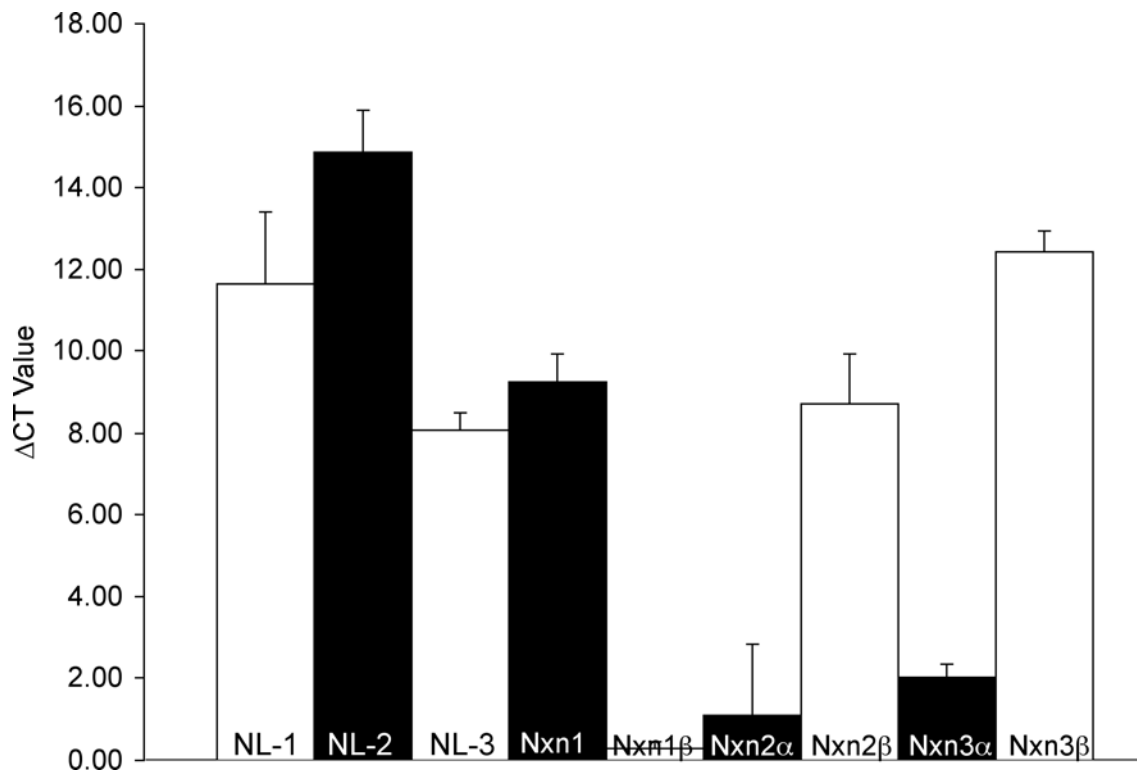

Supplement: en.2008-0274_4.pdf [file en.2008-0274_4.pdf]

Supplemental Figure 3.

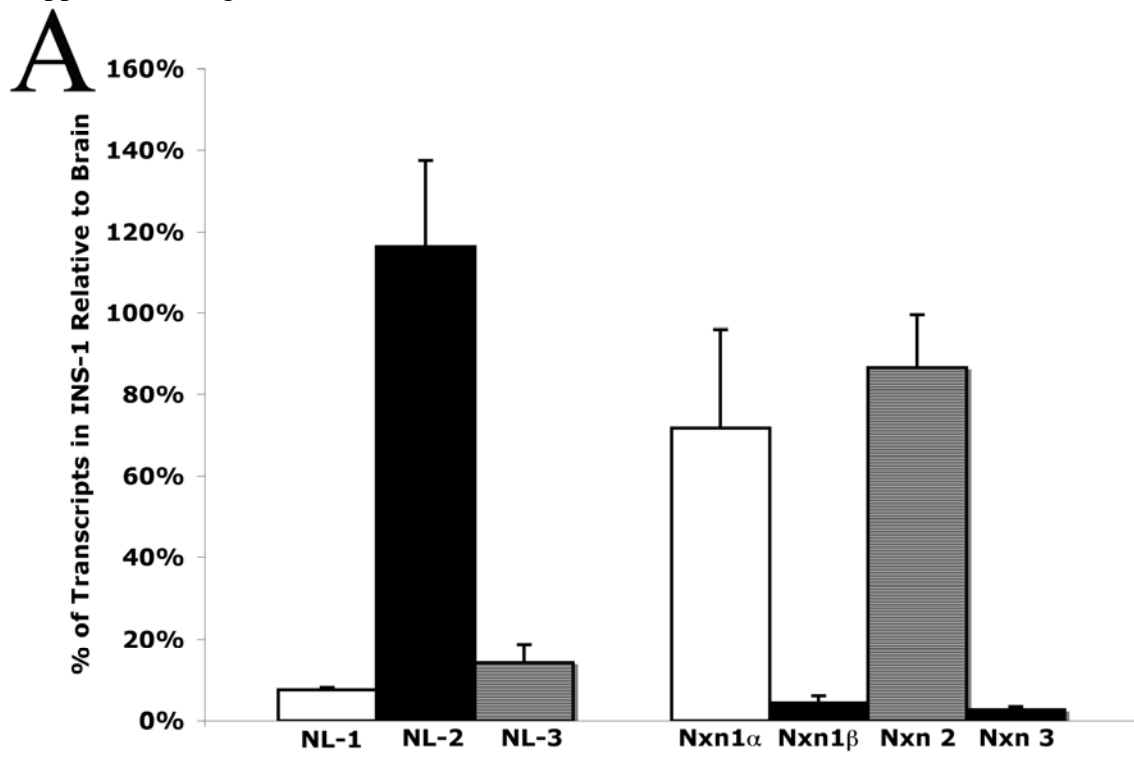

Supplement: en.2008-0274_5.pdf [file en.2008-0274_5.pdf]

Supplemental Figure 4.

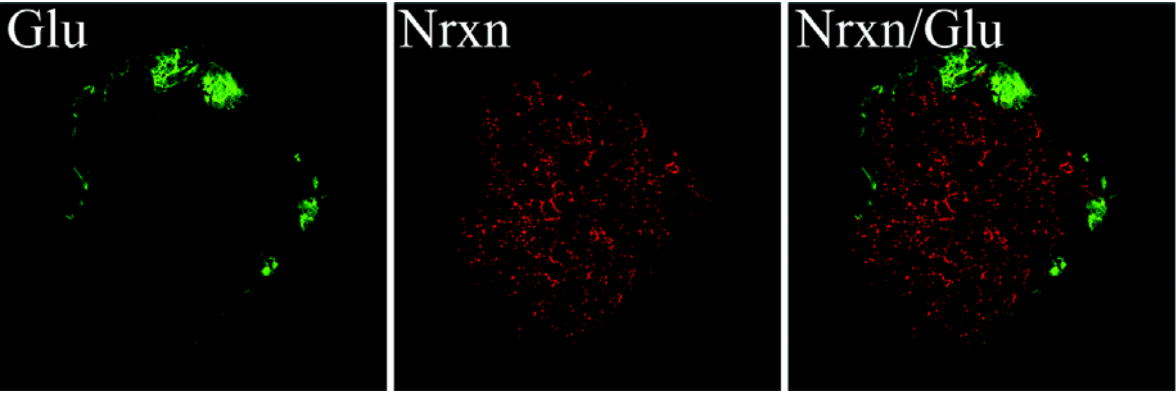

Supplement: en.2008-0274_6.pdf [file en.2008-0274_6.pdf]

Supplemental Figure 5.

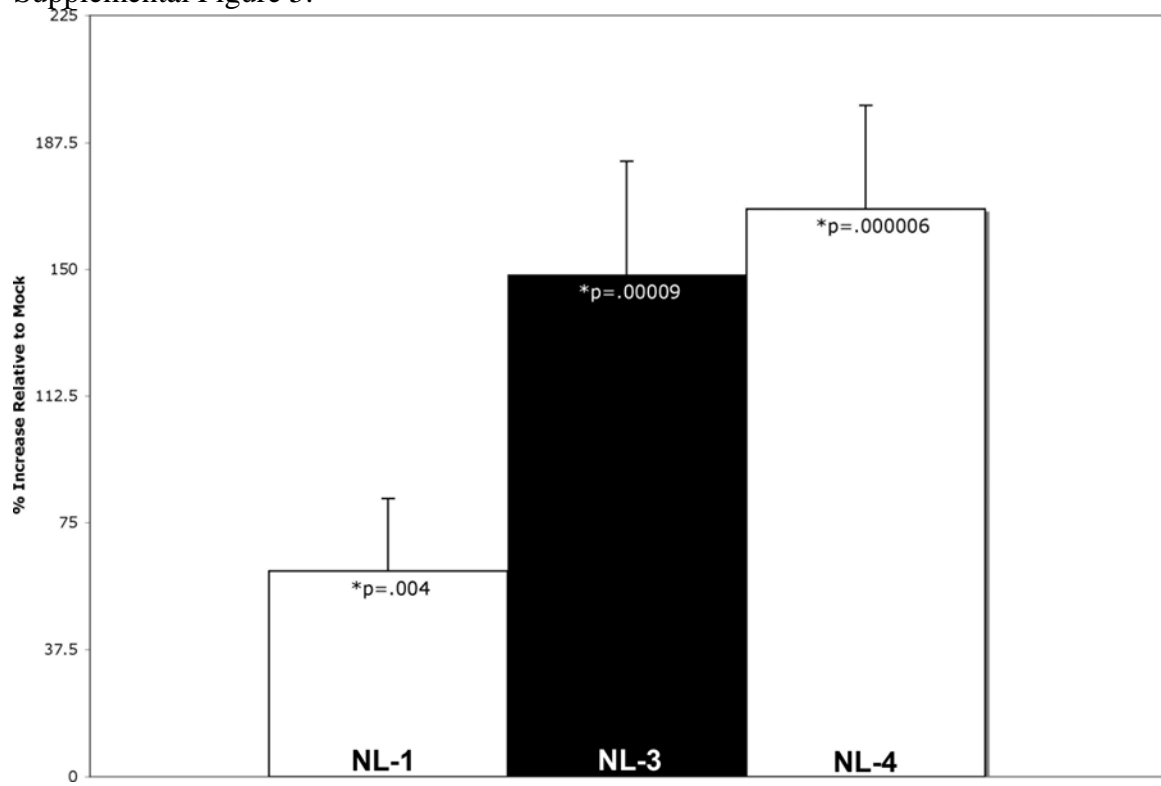

Supplement: en.2008-0274_7.pdf [file en.2008-0274_7.pdf]

Supplemental Figure 6

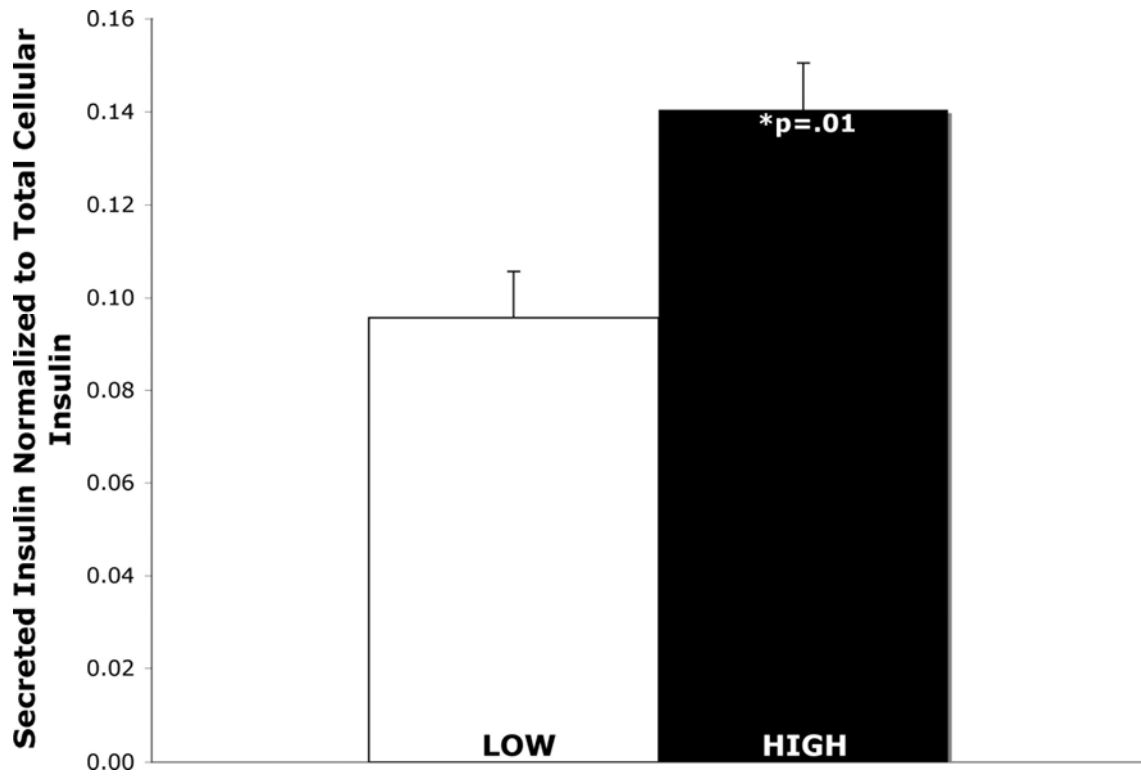

Supplement: en.2008-0274_8.pdf [file en.2008-0274_8.pdf]
